# Supplementary material for: Esterification of poly(γ-glutamic acid) (γ-PGA) mediated by its tetrabutylammonium salt
Source: Royal Society of Chemistry journal article supplement (doi:10.1039/c6ra08567a), 2016-01-01
Supplement: c6ra08567a1.pdf [file c6ra08567a1.pdf]

## Esterification of poly( $\gamma$ -glutamic acid) ( $\gamma$ -PGA) mediated by its tetrabutylammonium salt

M. Biagiotti,<sup>a</sup> G. Borghese,<sup>a</sup> P. Francescato,<sup>a</sup> C. F. Morelli,<sup>a</sup> A. M. Albertini,<sup>b</sup> T. Bavaro,<sup>c</sup> D. Ubiali,<sup>c,d</sup> R. Mendichi<sup>e</sup> and G. Speranza<sup>a,d</sup>

<sup>a</sup>Dipartimento di Chimica, Università degli Studi di Milano, via C. Golgi 19, I-20133 Milano (Italy)

<sup>b</sup>Dipartimento di Biologia e Biotecnologie "L. Spallanzani", Università degli Studi di Pavia, via A. Ferrata 9, I-27100 Pavia (Italy)

<sup>c</sup>Dipartimento di Scienze del Farmaco, Università degli Studi di Pavia, viale T. Taramelli 12, I-27100 Pavia (Italy)

<sup>d</sup>ISTM-CNR, via C. Golgi 19, I-20133 Milano (Italy)

<sup>e</sup>ISMAR-CNR, via E. Bassini 15, I-20133 Milano (Italy)

### Electronic Supplementary Information

|                                                                                                                                                                                                                                  |         |
|----------------------------------------------------------------------------------------------------------------------------------------------------------------------------------------------------------------------------------|---------|
| <b>Molecular weight distribution (MWD)</b>                                                                                                                                                                                       | pag. S2 |
| Table S1 Molecular weight distribution (MWD) of $\gamma$ -PGA (1), $\gamma$ -PGA sodium salt (2) and $\gamma$ -PGA tetrabutylammonium salt (3)                                                                                   | pag. S2 |
| Table S2 Molecular weight distribution (MWD) of poly( $\alpha$ -ethyl $\gamma$ -glutamate) (4), poly( $\alpha$ -benzyl $\gamma$ -glutamate) (5) and poly( $\alpha$ - <i>n</i> -butyl $\gamma$ -glutamate) (6)                    | pag. S2 |
| <b>Nuclear Magnetic Resonance (NMR)</b>                                                                                                                                                                                          | pag. S3 |
| Fig. S3 <sup>1</sup> H NMR of $\gamma$ -PGA tetrabutylammonium salt (3) (400 MHz, DMSO- <i>d</i> <sub>6</sub> )                                                                                                                  | pag. S3 |
| Fig. S4 <sup>13</sup> C NMR of $\gamma$ -PGA tetrabutylammonium salt (3) (100 MHz, DMSO- <i>d</i> <sub>6</sub> )                                                                                                                 | pag. S4 |
| <sup>1</sup> H NMR data of poly( $\alpha$ -ethyl $\gamma$ -glutamate) (4), poly( $\alpha$ -benzyl $\gamma$ -glutamate) (5) and poly( $\alpha$ - <i>n</i> -butyl $\gamma$ -glutamate) (6) (400 MHz, DMSO- <i>d</i> <sub>6</sub> ) | pag. S5 |

### Molecular weight distribution (MWD)

Table S1 Molecular weight distribution (MWD) of  $\gamma$ -PGA (1),  $\gamma$ -PGA sodium salt (2) and  $\gamma$ -PGA tetrabutylammonium salt (3)

| Sample | $M_p$<br>Kg mol <sup>-1</sup> | $M_n$<br>Kg mol <sup>-1</sup> | $M_w$<br>Kg mol <sup>-1</sup> | $M_z$<br>Kg mol <sup>-1</sup> | $M_w/M_n$ | $M_z/M_w$ | Rec. Mass<br>% |
|--------|-------------------------------|-------------------------------|-------------------------------|-------------------------------|-----------|-----------|----------------|
| 1      | 13.4                          | 12.7                          | 16.1                          | 20.9                          | 1.3       | 1.3       | 84.1           |
| 2      | 22.6                          | 20.6                          | 28.3                          | 39.8                          | 1.4       | 1.4       | 92.1           |
| 3      | 47.9                          | 12.6                          | 31.6                          | 47.0                          | 2.5       | 1.5       | 96.0           |

Table S2 Molecular weight distribution (MWD) of poly( $\alpha$ -ethyl  $\gamma$ -glutamate) (4), poly( $\alpha$ -benzyl  $\gamma$ -glutamate) (5) and poly( $\alpha$ -*n*-butyl  $\gamma$ -glutamate) (6)

| Sample | $M_p$<br>Kg mol <sup>-1</sup> | $M_n$<br>Kg mol <sup>-1</sup> | $M_w$<br>Kg mol <sup>-1</sup> | $M_z$<br>Kg mol <sup>-1</sup> | $M_w/M_n$ | $M_z/M_w$ | Rec. Mass<br>% |
|--------|-------------------------------|-------------------------------|-------------------------------|-------------------------------|-----------|-----------|----------------|
| 4 A1   | 29.6                          | 19.3                          | 33.4                          | 52.7                          | 1.7       | 1.6       | 95.2           |
| 4 B1   | 15.3                          | 12.0                          | 30.0                          | 73.2                          | 2.5       | 2.4       | 15.6           |
| 4 A2   | 30.4                          | 20.1                          | 30.8                          | 42.6                          | 1.5       | 1.4       | 93.4           |
| 4 B2   | 23.3                          | 10.9                          | 21.8                          | 34.8                          | 2.0       | 1.6       | 11.6           |
| 5      | 45.2                          | 19.2                          | 39.5                          | 61.7                          | 2.1       | 1.6       | 22.4           |
| 6      | 23.1                          | 14.0                          | 20.8                          | 28.5                          | 1.5       | 1.4       | 50.6           |

## Nuclear Magnetic Resonance (NMR)

Fig. S3  $^1\text{H}$  NMR of  $\gamma$ -PGA tetrabutylammonium salt (3) (400 MHz, DMSO- $d_6$ )

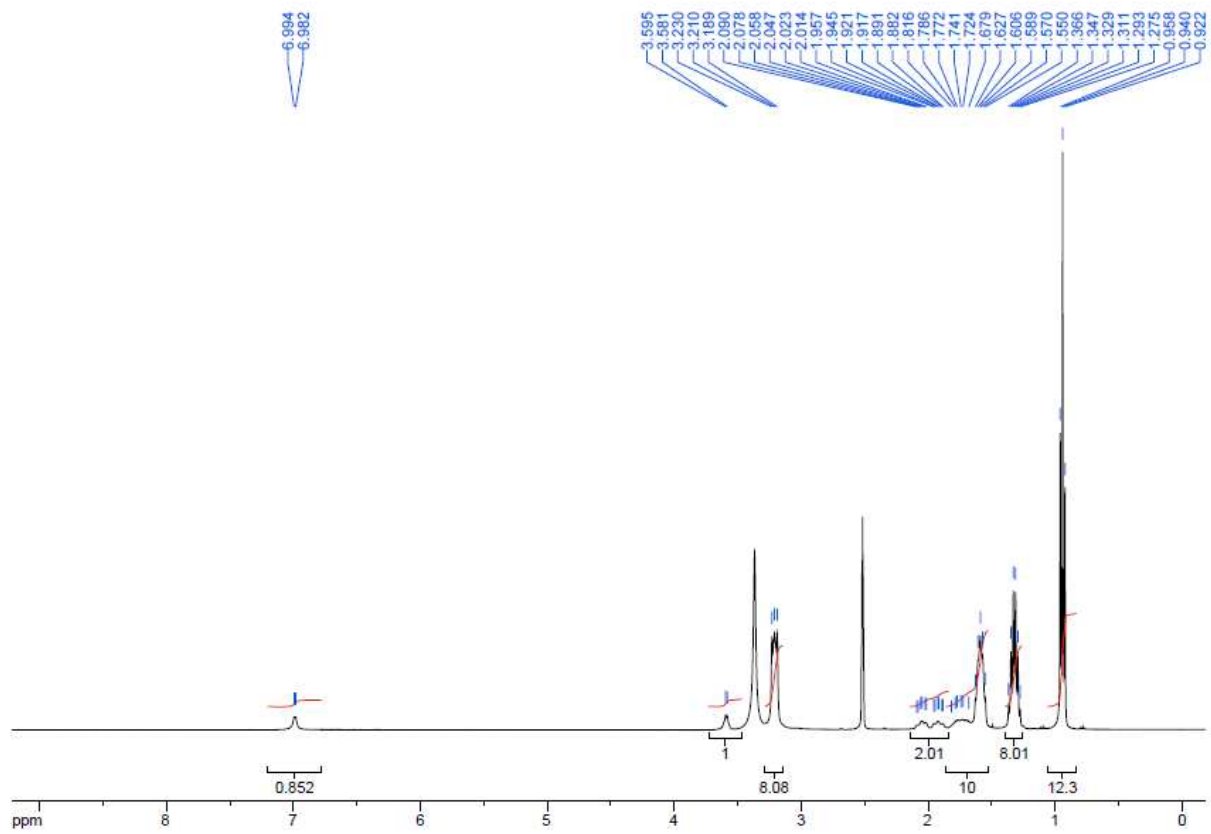

Fig. S4  $^{13}\text{C}$  NMR of  $\gamma$ -PGA tetrabutylammonium salt (3) (100 MHz,  $\text{DMSO-d}_6$ )

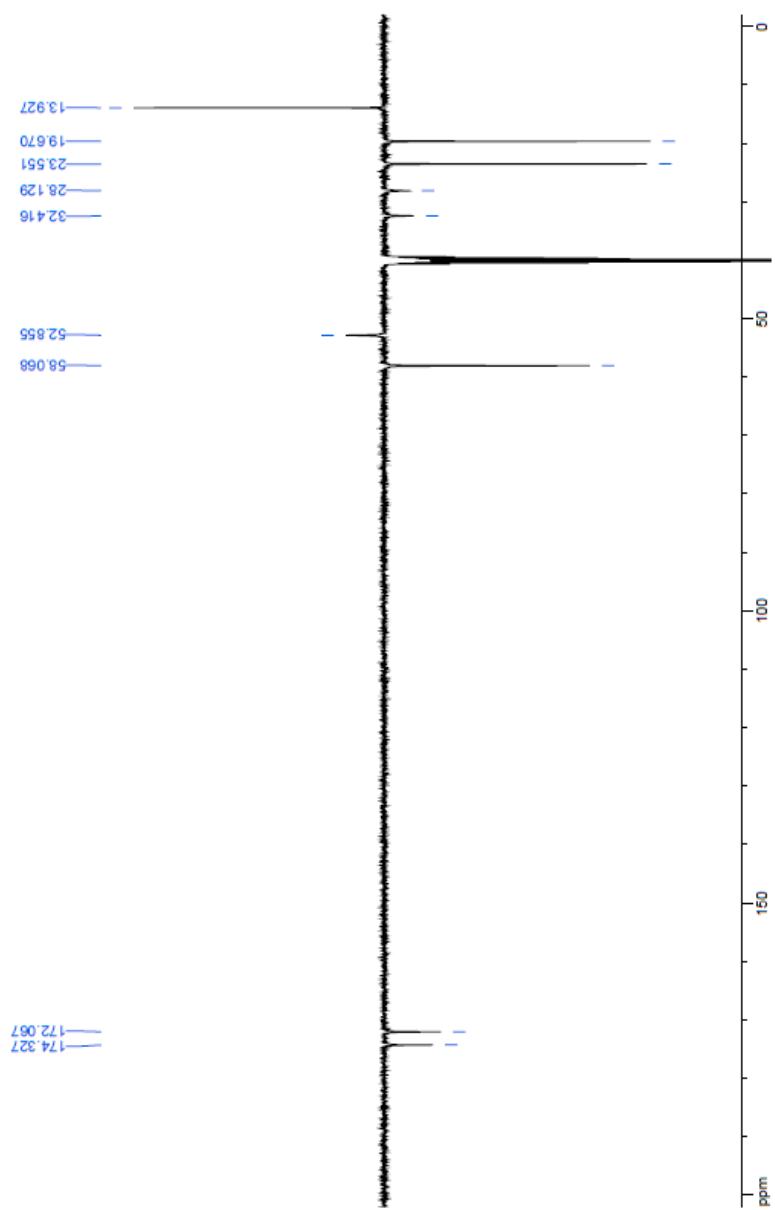

<sup>1</sup>H NMR of poly( $\alpha$ -ethyl  $\gamma$ -glutamate) (4)

<sup>1</sup>H NMR (400 MHz, DMSO-d<sub>6</sub>)  $\delta$  1.18 (t, J=7.2 Hz, 3H, -OCH<sub>2</sub>CH<sub>3</sub>), 1.70-1.81 (m, 1H, -CH<sub>2</sub>CH<sub>2</sub>CO-), 1.89-2.01 (m, 1H, -CH<sub>2</sub>CH<sub>2</sub>CO-), 2.16-2.26 (m, 2H, -CH<sub>2</sub>CH<sub>2</sub>CO-), 4.02-4.12 (m, 2H, -OCH<sub>2</sub>CH<sub>3</sub>), 4.15-4.23 (broad m, 1H, -CHCOO), 8.24 (d, J=7.4 Hz, 1H, -CONH).

Signal area *ratio* of the side-chain OCH<sub>2</sub> to the main-chain CH was:

- 1.43 in the case of 4A1, corresponding to 72% functionalization degree;
- 2.0 in the case of 4A2, corresponding to 100% functionalization degree;
- 0.45 in the case of 4B1, corresponding to 22% functionalization degree;
- 2.0 in the case of 4B2, corresponding to 100% functionalization degree.

Additional signals in the intervals 4.2-4.3 ppm and 8.2-8.3 ppm, corresponding to CHCOO and CONH of the underivatized polymer were observed in 4A1 and 4B1.

<sup>1</sup>H NMR of poly( $\alpha$ -benzyl  $\gamma$ -glutamate) (5)

<sup>1</sup>H NMR (400 MHz, DMSO-d<sub>6</sub>)  $\delta$  1.75-1.86 (broad m, 1H, -CH<sub>2</sub>CH<sub>2</sub>CO-), 1.95-2.05 (broad m, 1H, -CH<sub>2</sub>CH<sub>2</sub>CO-), 2.23 (br t, 2H, J=7.6 Hz, -CH<sub>2</sub>CH<sub>2</sub>CO-), 4.27-4.33 (broad m, 1H, -CHCOO), 5.10 (s, 2H, OCH<sub>2</sub>C<sub>6</sub>H<sub>5</sub>), 7.32-7.34 (m, 5H, -C<sub>6</sub>H<sub>5</sub>), 8.19 (d, J=7.2 Hz, 1H, -CONH).

Signal area *ratio* of the side-chain OCH<sub>2</sub> to the main-chain CH was 2, corresponding to 100% functionalization degree.

<sup>1</sup>H NMR of poly( $\alpha$ -*n*-butyl  $\gamma$ -glutamate) (6)

<sup>1</sup>H NMR (400 MHz, DMSO-d<sub>6</sub>)  $\delta$  0.87 (t, J=7.2 Hz, 3H, -OCH<sub>2</sub>CH<sub>2</sub>CH<sub>2</sub>CH<sub>3</sub>), 1.26-1.38 (m, 2H, -OCH<sub>2</sub>CH<sub>2</sub>CH<sub>2</sub>CH<sub>3</sub>), 1.48-1.60 (m, 8H, -OCH<sub>2</sub>CH<sub>2</sub>CH<sub>2</sub>CH<sub>3</sub>), 1.69-1.83 (broad m, 1H, -CH<sub>2</sub>CH<sub>2</sub>CO-), 1.90-2.04 (broad m, 1H, -CH<sub>2</sub>CH<sub>2</sub>CO-), 2.16-2.26 (broad m, 2H, -CH<sub>2</sub>CH<sub>2</sub>CO-), 3.96-4.10 (m, 2H, -OCH<sub>2</sub>CH<sub>2</sub>CH<sub>2</sub>CH<sub>3</sub>), 4.14-4.26 (broad m, 1H, -CHCOO), 8.24 (d, J=6.9 Hz, 1H, -CONH).

Signal area *ratio* of the side-chain OCH<sub>2</sub> to the main-chain CH was 1.99, corresponding to 99% functionalization degree.
